# Supplementary material for: Deep neural networks outperform human expert's capacity in characterizing bioleaching bacterial biofilm composition
Source: PubMed Central journal article supplement — Biotechnol Rep (Amst). 2019 Mar 7;22:e00321. doi: 10.1016/j.btre.2019.e00321 (PMC6430008; doi:10.1016/j.btre.2019.e00321), 2019-03-07
Supplement: mmc1.pdf [file mmc1.pdf]

# SUPPLEMENTARY MATERIAL

## Deep Neural Networks Outperform Human Expert's Capacity in Characterizing Bioleaching Bacterial Biofilm Composition

Antoine Buetti-Dinh<sup>\*a,b</sup>, Vanni Galli<sup>\*c</sup>, Sören Bellenberg<sup>\*d</sup>, Olga Ilie<sup>a,b</sup>, Malte Herold<sup>e</sup>,  
Stephan Christel<sup>f</sup>, Mariia Boretska<sup>d</sup>, Igor V. Pivkin<sup>a,b</sup>, Paul Wilmes<sup>e</sup>, Wolfgang Sand<sup>d,g,h</sup>,  
Mario Vera<sup>i</sup>, Mark Dopson<sup>f</sup>

<sup>a</sup>*Institute of Computational Science, Faculty of Informatics, Università della Svizzera italiana, Lugano, Switzerland*

<sup>b</sup>*Swiss Institute of Bioinformatics, Lausanne, Switzerland*

<sup>c</sup>*Institute for Information Systems and Networking, University of Applied Sciences of Southern Switzerland, Manno, Switzerland*

<sup>d</sup>*Fakultät für Chemie, Biofilm Centre, Universität Duisburg-Essen, Essen, Germany*

<sup>e</sup>*Luxembourg Centre for Systems Biomedicine, University of Luxembourg, Belvaux, Luxembourg*

<sup>f</sup>*Centre for Ecology and Evolution in Microbial Model Systems, Linnaeus University, Kalmar, Sweden*

<sup>g</sup>*College of Environmental Science and Engineering, Donghua University, Shanghai, People's Republic of China*

<sup>h</sup>*Mining Academy and Technical University Freiberg, Freiberg, Germany*

<sup>i</sup>*Institute for Biological and Medical Engineering. Schools of Engineering, Medicine & Biological Sciences. Department of Hydraulic & Environmental Engineering, Pontificia Universidad Católica de Chile, Santiago, Chile*

---

\*Equal contribution

## Contents

|   |                                                              |   |
|---|--------------------------------------------------------------|---|
| 1 | Deep Learning Resampling                                     | 2 |
| 2 | Human Expert's Performance                                   | 3 |
| 3 | Negative Control                                             | 5 |
| 4 | Example of AL Images                                         | 5 |
| 5 | Deep Learning Performance <i>vs.</i> Amount of Training Data | 6 |
| 6 | TensorFlow code and microscopy images                        | 7 |
| 7 | Test For Humans                                              | 8 |

## 1. Deep Learning Resampling

| Run | Correct Prediction Rate |
|-----|-------------------------|
| 1   | 90.20%                  |
| 2   | 89.80%                  |
| 3   | 93.10%                  |
| 4   | 87.30%                  |
| 5   | 90.20%                  |
| 6   | 88.90%                  |
| 7   | 86.30%                  |
| 8   | 90.10%                  |
| 9   | 89.50%                  |
| 10  | 87.40%                  |
|     | <b>89.28%</b>           |

Figure S 1: Resampling. Different division of the images into training and testing sets is carried out in ten different runs and averaged (bold).

## 2. Human Expert's Performance

|              |     | PREDICTED CLASS |   |     |    |   | correct prediction rate |
|--------------|-----|-----------------|---|-----|----|---|-------------------------|
|              |     | A               | L | SAL | SL | S |                         |
| ACTUAL CLASS | A   | 2               | 0 | 0   | 0  | 0 | 100%                    |
|              | L   | 0               | 1 | 0   | 0  | 0 | 50%                     |
|              | SAL | 0               | 0 | 1   | 1  | 0 | 50%                     |
|              | SL  | 0               | 0 | 0   | 2  | 0 | 100%                    |
|              | S   | 0               | 0 | 0   | 0  | 2 | 100%                    |
|              |     |                 |   |     |    |   | 80.0%                   |

Figure S 2: Best human experts' performance in predicting the species composition of bacterial biofilms (see "Human Expert 12" in Fig. S3). The matrices indicate the share of images correctly deduced in the diagonal line (shaded grey) and categories the misclassified images were assigned are shown in the horizontal plane.

| Correct Answer | Human Expert 1 | Human Expert 2 | Human Expert 3 | Human Expert 4 |     |
|----------------|----------------|----------------|----------------|----------------|-----|
| AXX            | A              | A              | SAX            | AXX            |     |
| SXX            | S              | S              | SXX            | SXX            |     |
| SAL            | SL             | SL             | SAL            | LSX            |     |
| LXX            | A              | L              | LXX            | ALX            |     |
| AXX            | SA             | A              | AXX            | AXX            |     |
| SLX            | SA             | SA             | SLX            | ALS            |     |
| SXX            | S              | S              | SXX            | SXX            |     |
| SLX            | SL             | SL             | SAX            | ALS            |     |
| LXX            | A              | L              | SXX            | ALX            |     |
| SAL            | SA             | SA             | LXX            | SAX            |     |
| Accuracy       |                | 0.4            | 0.7            | 0.6            | 0.5 |

  

| Correct Answer | Human Expert 5 | Human Expert 6 | Human Expert 7 | Human Expert 8 |     |
|----------------|----------------|----------------|----------------|----------------|-----|
| AXX            | AXX            | SAX            | ALX            | AXX            |     |
| SXX            | SXX            | SXX            | SXX            | SAX            |     |
| SAL            | LSX            | SAL            | ALX            | SAL            |     |
| LXX            | ALX            | LXX            | ASX            | SLX            |     |
| AXX            | LXX            | AXX            | AXX            | AXX            |     |
| SLX            | ALS            | SAL            | LSX            | SLX            |     |
| SXX            | SXX            | SXX            | LSX            | SXX            |     |
| SLX            | LSX            | SLX            | ASX            | SLX            |     |
| LXX            | ALX            | LXX            | ALX            | SAL            |     |
| SAL            | SLX            | SAX            | ASL            | LXX            |     |
| Accuracy       |                | 0.4            | 0.7            | 0.4            | 0.7 |

  

| Correct Answer | Human Expert 9 | Human Expert 10 | Human Expert 11 | Human Expert 12 |     |
|----------------|----------------|-----------------|-----------------|-----------------|-----|
| AXX            | AXX            | AXX             | A               | A               |     |
| SXX            | SXX            | SXX             | S               | S               |     |
| SAL            | LAX            | LSX             | AS              | SL              |     |
| LXX            | LXX            | LXX             | LS              | AL              |     |
| AXX            | AXX            | AXX             | A               | A               |     |
| SLX            | SAL            | SAL             | LS              | SL              |     |
| SXX            | SXX            | SXX             | S               | S               |     |
| SLX            | SAL            | SAX             | LS              | SL              |     |
| LXX            | LXX            | LXX             | LC=LA=LS?       | L               |     |
| SAL            | SAX            | SAX             | LS              | SLA             |     |
| Accuracy       |                | 0.6             | 0.6             | 0.6             | 0.8 |

  

| Correct Answer | Human Expert 13 | Human Expert 14 | Human Expert 15 | Human Expert 16 |     |
|----------------|-----------------|-----------------|-----------------|-----------------|-----|
| AXX            | A               | AXX             | AXX             | SAX             |     |
| SXX            | S               | SXX             | SXX             | SXX             |     |
| SAL            | AL              | LSX             | SLX             | LAX             |     |
| LXX            | L               | ALX             | ALX             | LXX             |     |
| AXX            | A               | LXX             | LXX             | AXX             |     |
| SLX            | SL              | SLA             | SLX             | SLA             |     |
| SXX            | S               | SXX             | SAX/SLX         | SXX             |     |
| SLX            | SAL             | SLX             | SAX/SLX         | SAX             |     |
| LXX            | L               | LXX             | ALX             | LXX             |     |
| SAL            | SA              | SAX             | SAX             | LAX             |     |
| Accuracy       |                 | 0.7             | 0.5             | 0.3             | 0.5 |

  

| Correct Answer | Human Expert 17 | Human Expert 18 | Human Expert 19 | Human Expert 20 |     |
|----------------|-----------------|-----------------|-----------------|-----------------|-----|
| AXX            | A               | ASX             | LXX             | LXX             |     |
| SXX            | S               | SXX             | SXX             | SXX             |     |
| SAL            | L               | LSX             | SAX             | SAX             |     |
| LXX            | L               | AXX             | LXX             | SAL             |     |
| AXX            | A               | LXX             | SAL             | LAX             |     |
| SLX            | AL              | ALS             | SAL             | LSX             |     |
| SXX            | S               | SXX             | SXX             | SXX             |     |
| SLX            | AL              | ALS             | SAL             | LXX             |     |
| LXX            | L               | ALX             | LXX             | SXX             |     |
| SAL            | A               | SLX             | SLX             | SLX             |     |
| Accuracy       |                 | 0.6             | 0.2             | 0.4             | 0.3 |

Figure S 3: Performance of the individual human experts in the custom-built double-blind test. Green highlights indicate correct answer.

### 3. Negative Control

|          |        |
|----------|--------|
| AXX      | 16.00% |
| LXX      | 12.00% |
| SAL      | 21.00% |
| SAX      | 17.00% |
| SLX      | 15.00% |
| SXX      | 19.00% |
| Expected | 16.67% |

Figure S 4: Negative control. Performance of deep neural networks when subjected to samples devoid of bacteria, and consisting only on chalcopyrite grains.

### 4. Example of AL Images

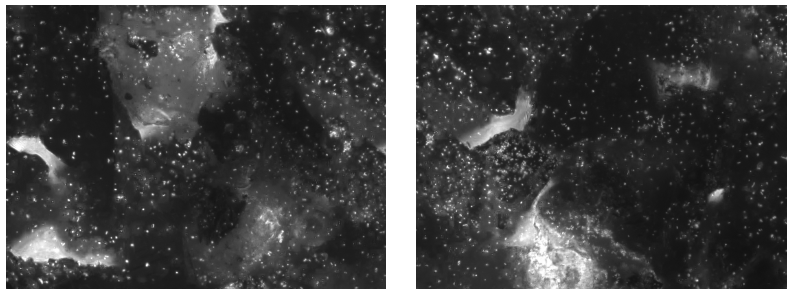

Figure S 5: Example of EFM images representing the AL biofilm category.

## 5. Deep Learning Performance *vs.* Amount of Training Data

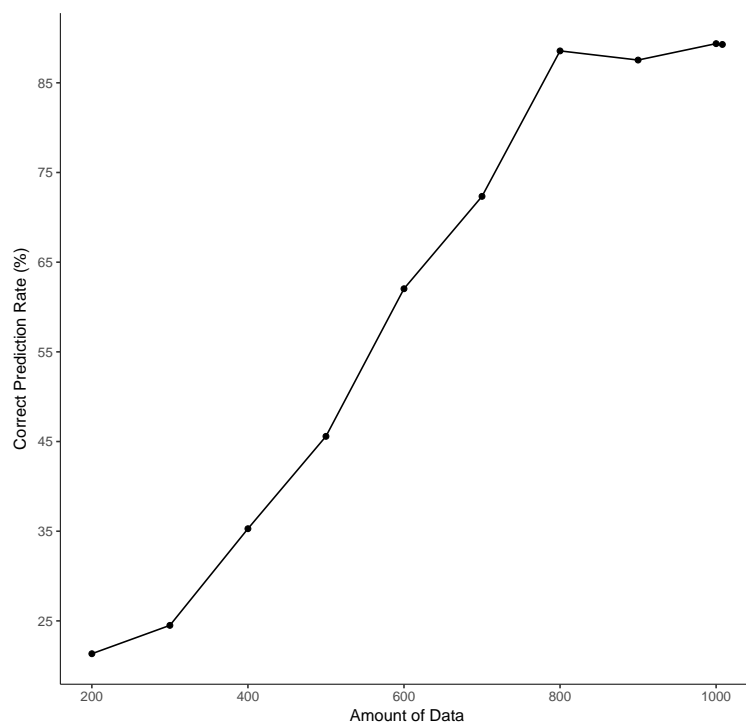

Figure S 6: Deep learning performance *vs.* amount of training data. The algorithm performance was tested in its accuracy expressed in percentage of images accurately classified as a function of the number of images used for training. Data augmentation was applied by duplicating training images. The correct prediction rate was obtained by averaging the outcome over the different image categories.

## **6. TensorFlow code and microscopy images**

TensorFlow code describing the convolutional neural network (CNN) used in this study, as well as the images used for CNN training and testing are available in the FAIRDOMHub repository (DOI: [10.15490/fairdomhub.1.investigation.281.1](https://doi.org/10.15490/fairdomhub.1.investigation.281.1)).



## 7. Test For Humans

# Guess the Microbes !

In the following pages you can see microscopy images of microbial biofilms. The biofilms are composed of bacteria (the bright dots) that feed on mineral particles (dark areas).

After looking at some labelled examples of the different biofilms formed by different bacterial mixes (Fig.1-6), will you be able to correctly guess unlabelled images in the last two pages (Fig.7-8) ?

## BACKGROUND

With this test, we would like to study the performance of a computer program to correctly classify microscopy images, based on the bacterial composition of the represented biofilm. The method relies on convolutional neural networks (CNNs, a type of artificial neural networks used in deep learning), which were previously trained on ~500 images.

In particular, this test will allow us to compare the performance of deep learning *vs.* the human capacity in distinguishing biofilm composition based on microscopy images.

Spoiler alert! The computer program turned out to be quite good, reaching ~90% accuracy in guessing the correct image type, can you do better ?

# 1 TRAINING

The following images are representative of the biofilms formed by the different bacterial mixes. There are three species:

- ★ *Acidithiobacillus caldus*
- ★ *Leptospirillum ferriphilum*
- ★ *Sulfobacillus thermosulfidooxidans*

labelled as **A**, **L** and **S**, respectively.

Images represent biofilms of mixtures composed between 1-3 of these bacteria. For example, the mixture ALX contains the first two bacteria listed above, and not the third (indicated as “X”). Similarly, LXX indicates that the biofilm mixture is only composed of L. And so on...

Optionally, you can look at more such images in the folders named with the mixture names, see the folder `more_images` (you can download it at <https://goo.gl/Yc6vcT> (~200 MB)).

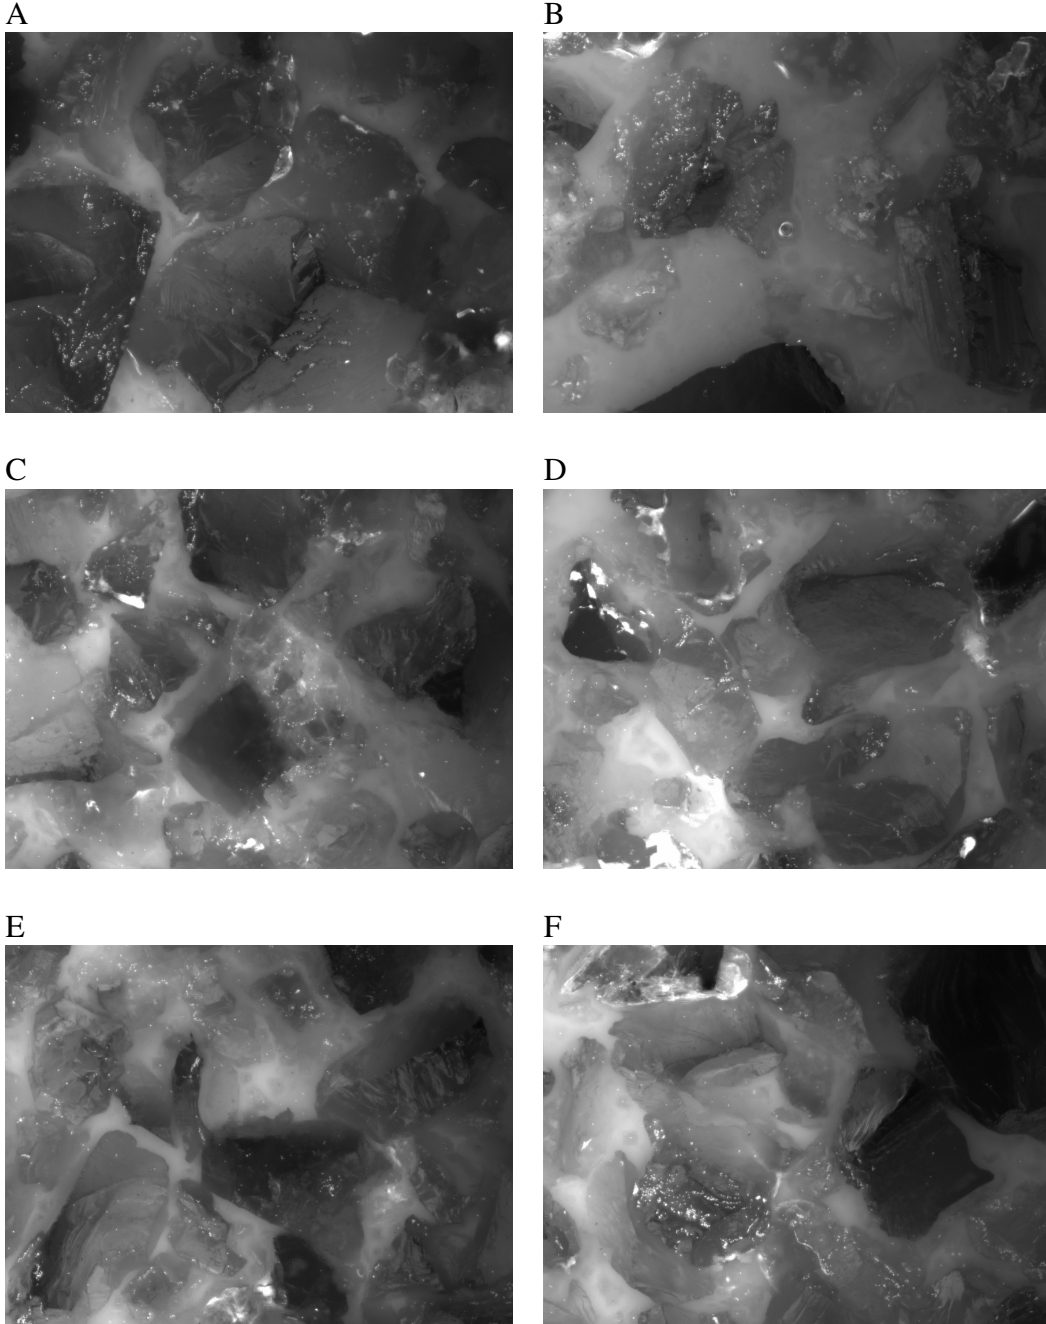

Figure 1: AXX. More images can be found in the folder `more_images/AXX`.

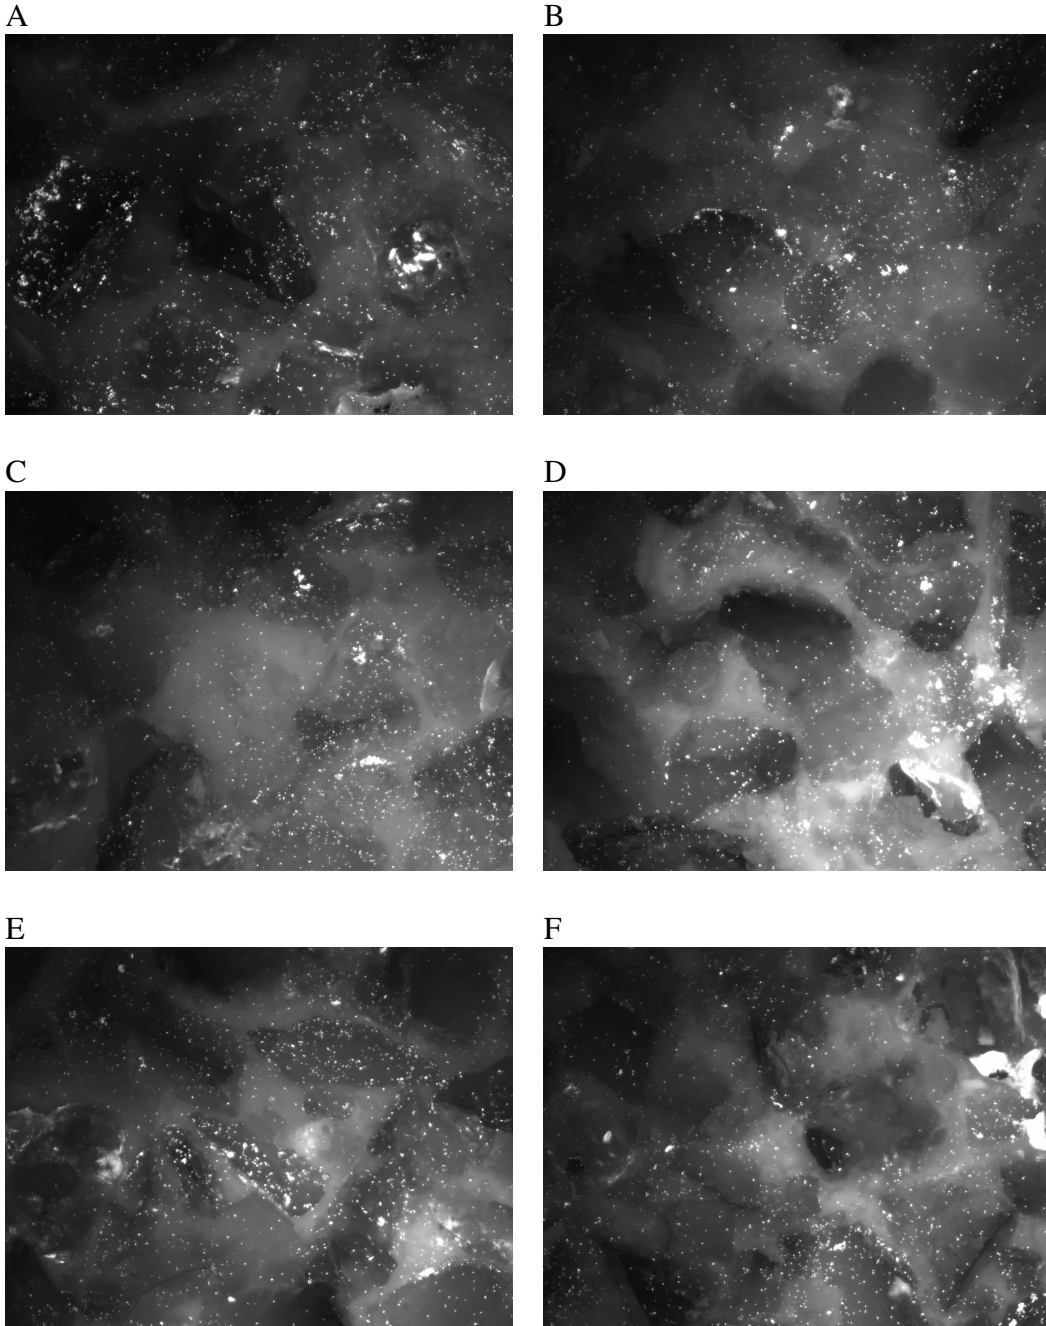

Figure 2: LXX. More images can be found in the folder `more_images/LXX`.

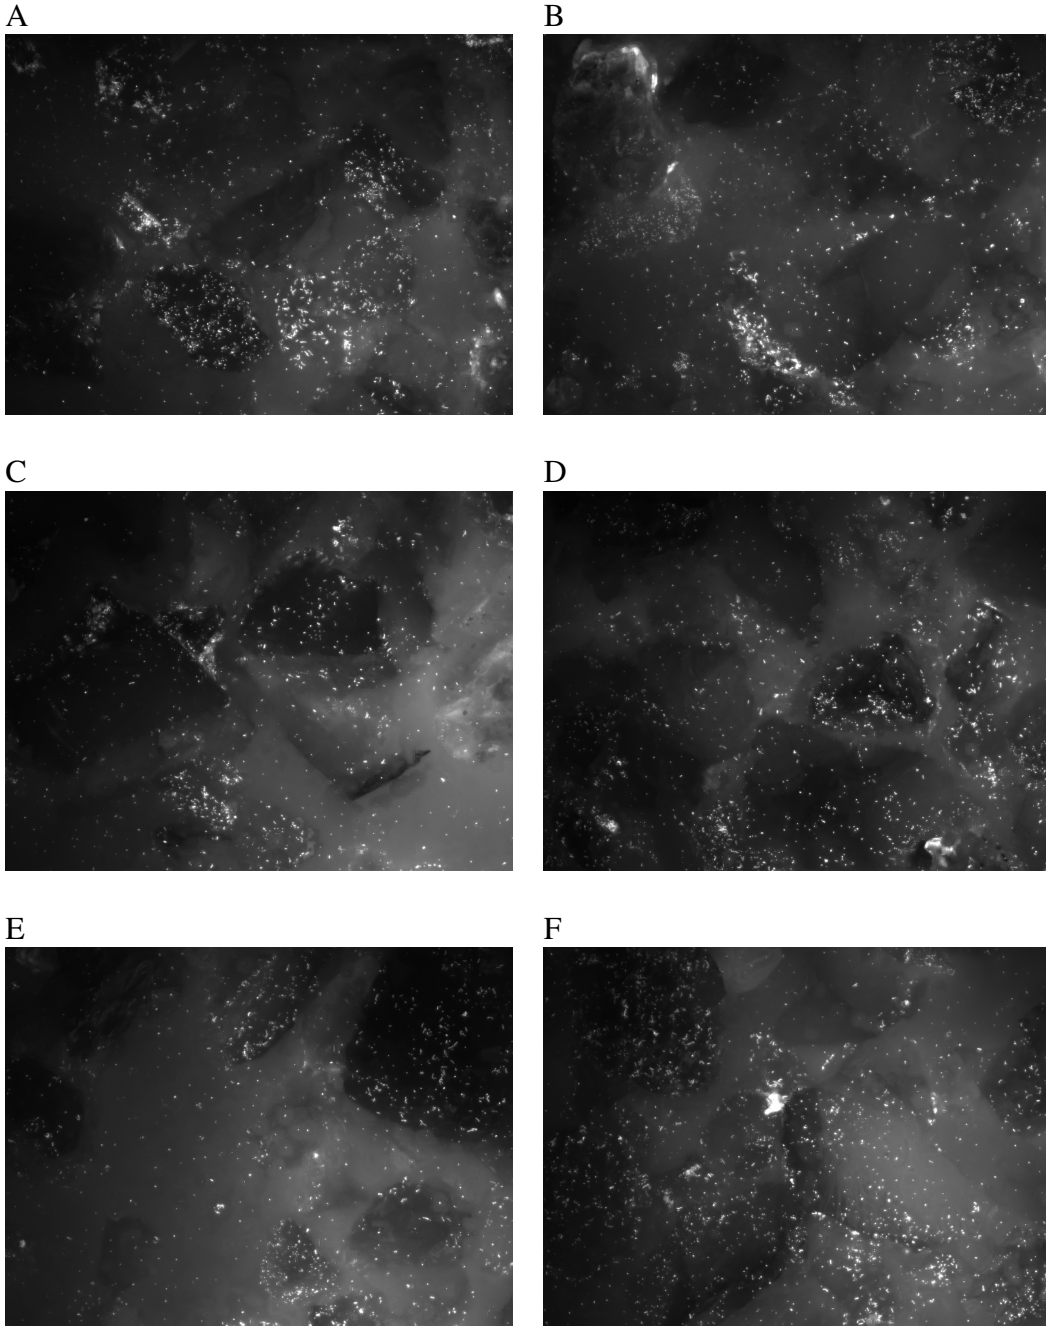

Figure 3: SAL. More images can be found in the folder `more_images/SAL`.

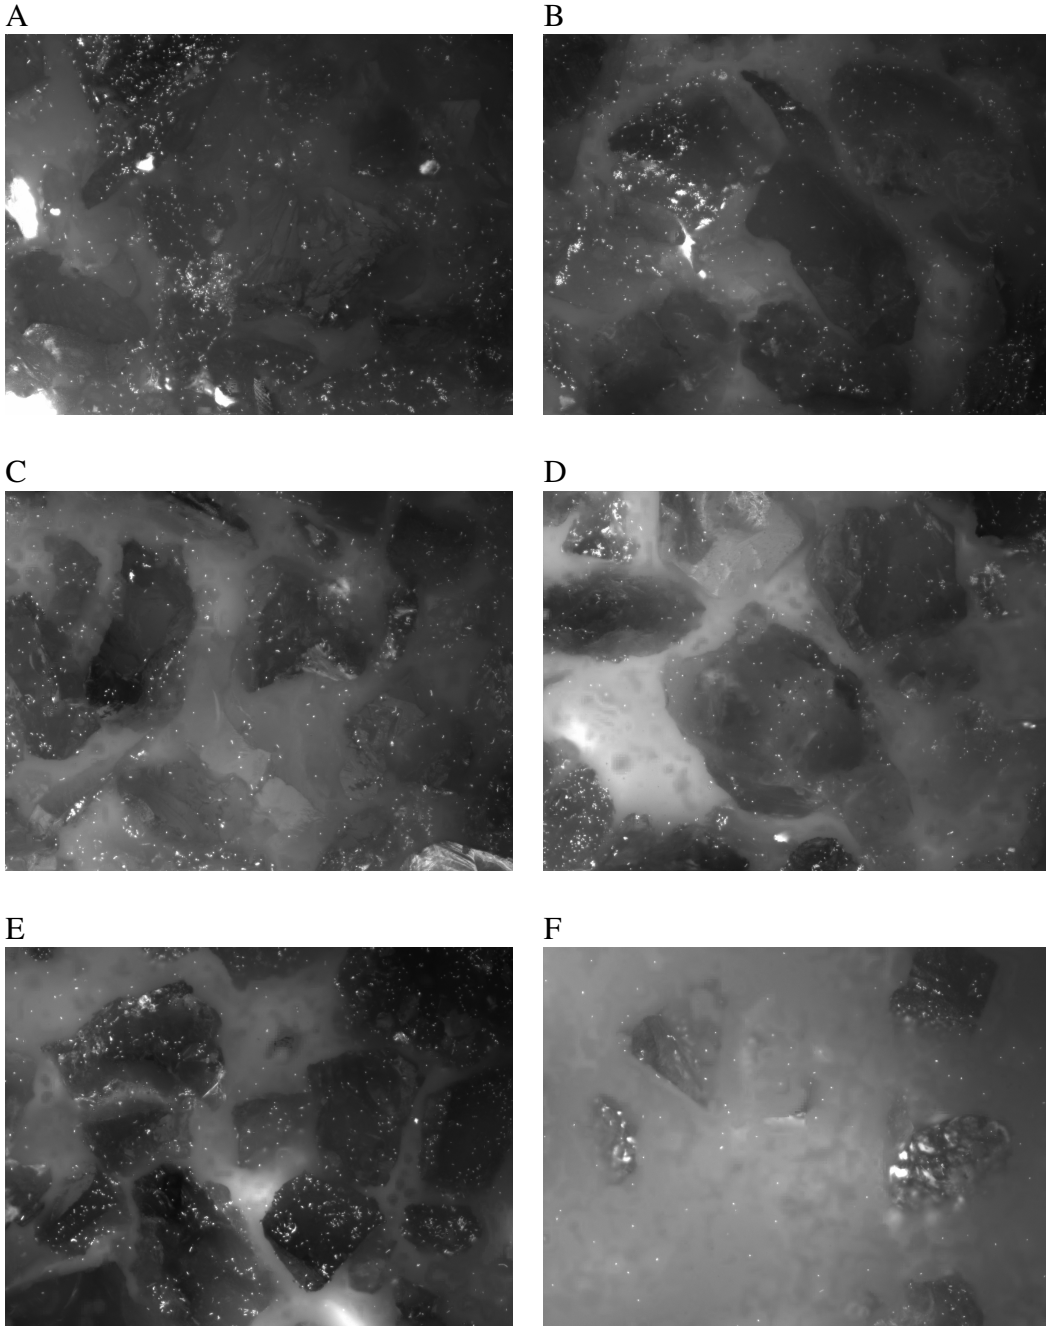

Figure 4: SAX. More images can be found in the folder `more_images/SAX`.

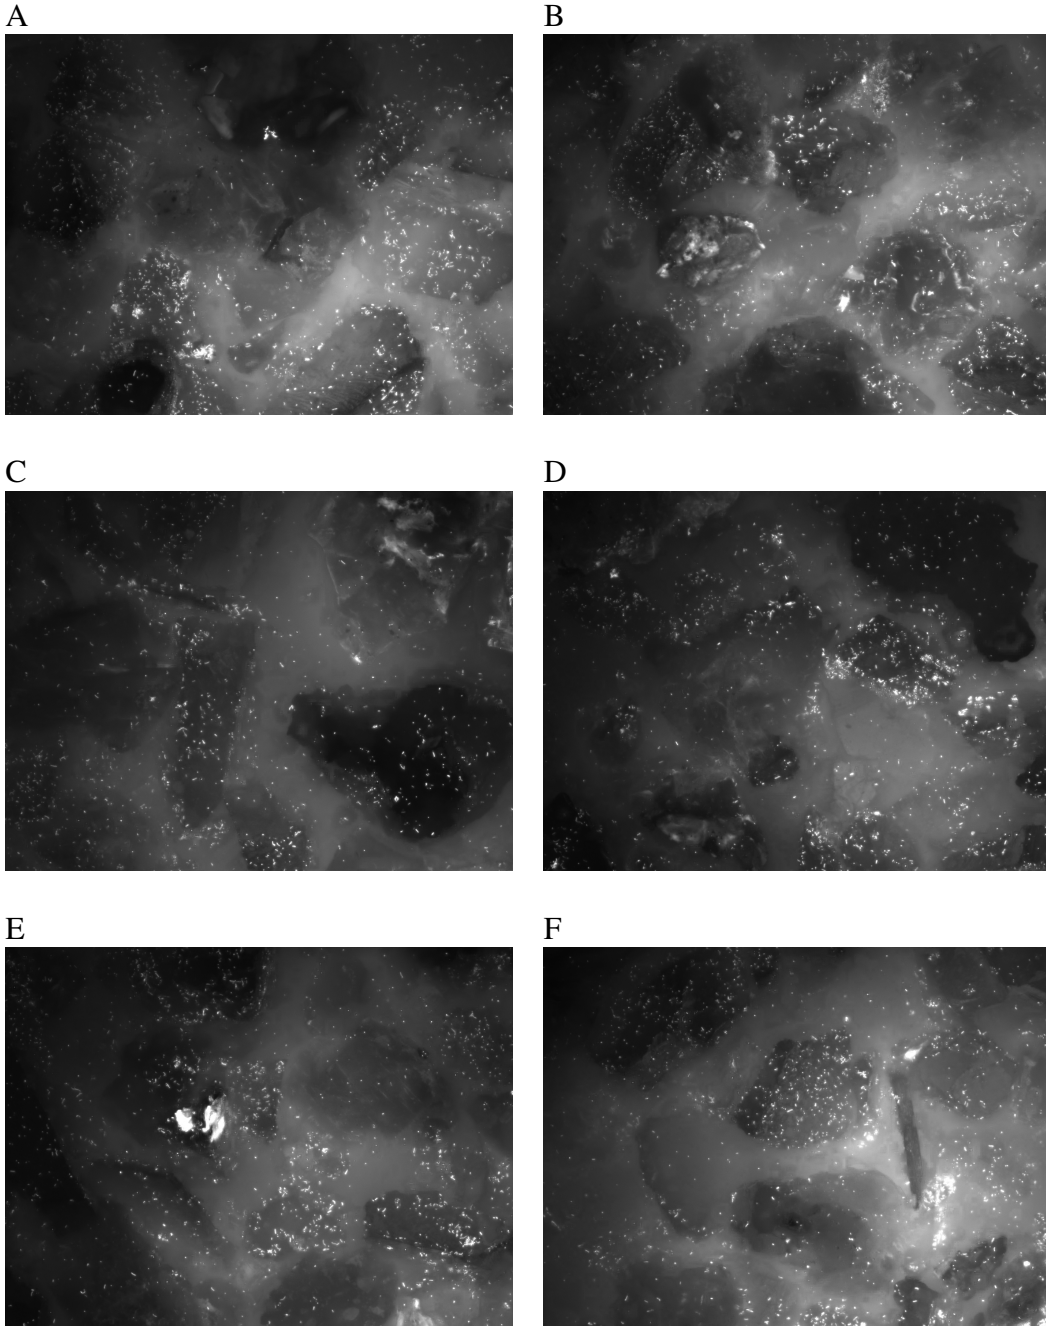

Figure 5: SLX. More images can be found in the folder `more_images/SLX`.



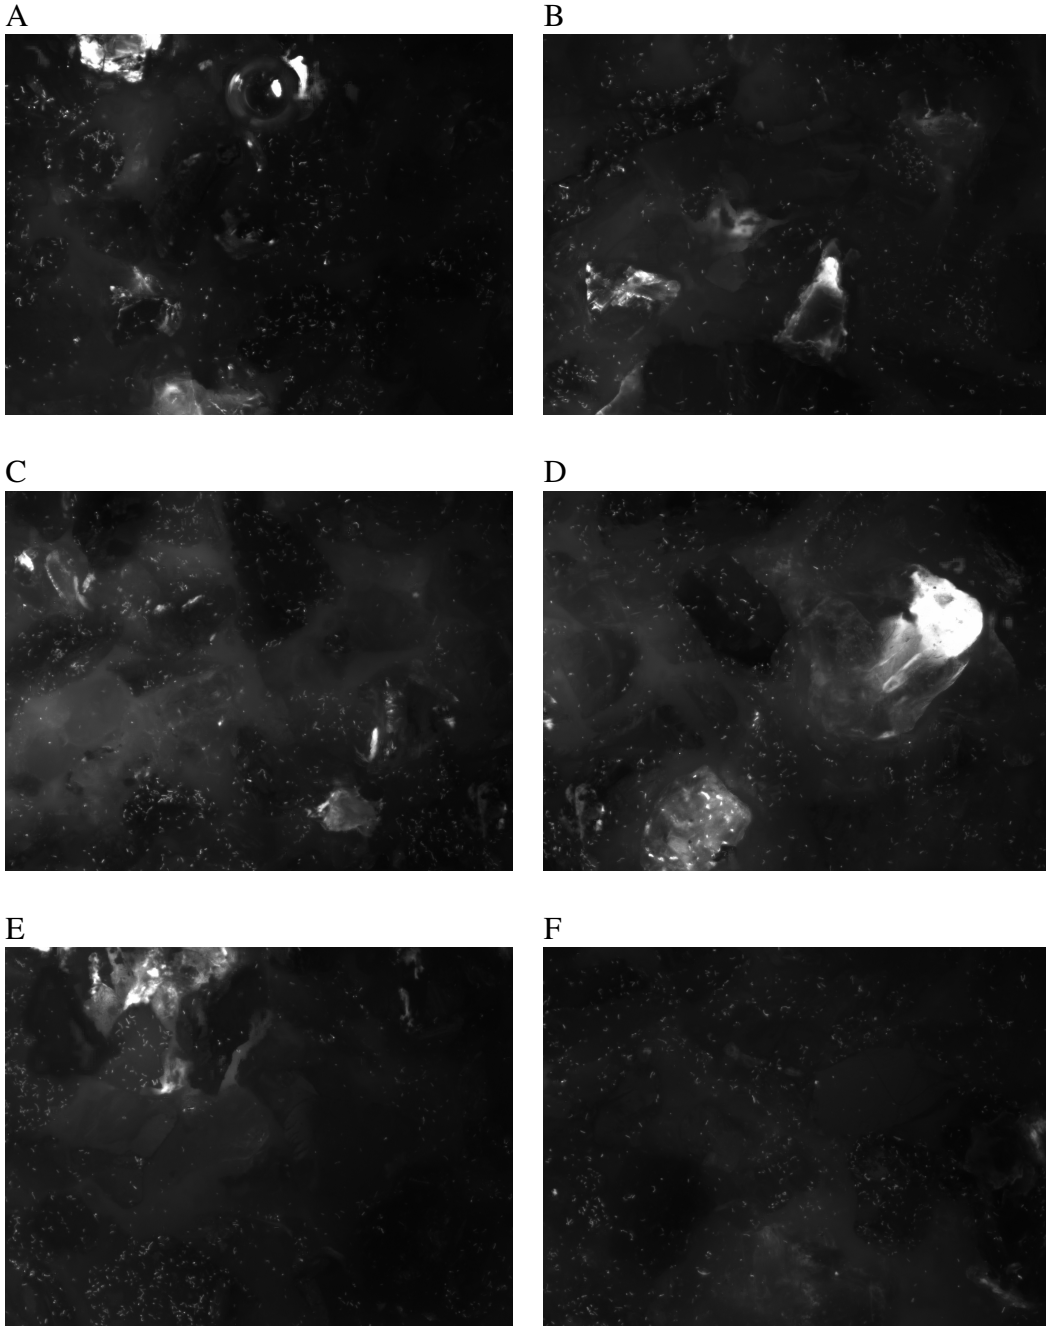

Figure 6: SXX. More images can be found in the folder `more_images/SXX`.

## 2 TEST

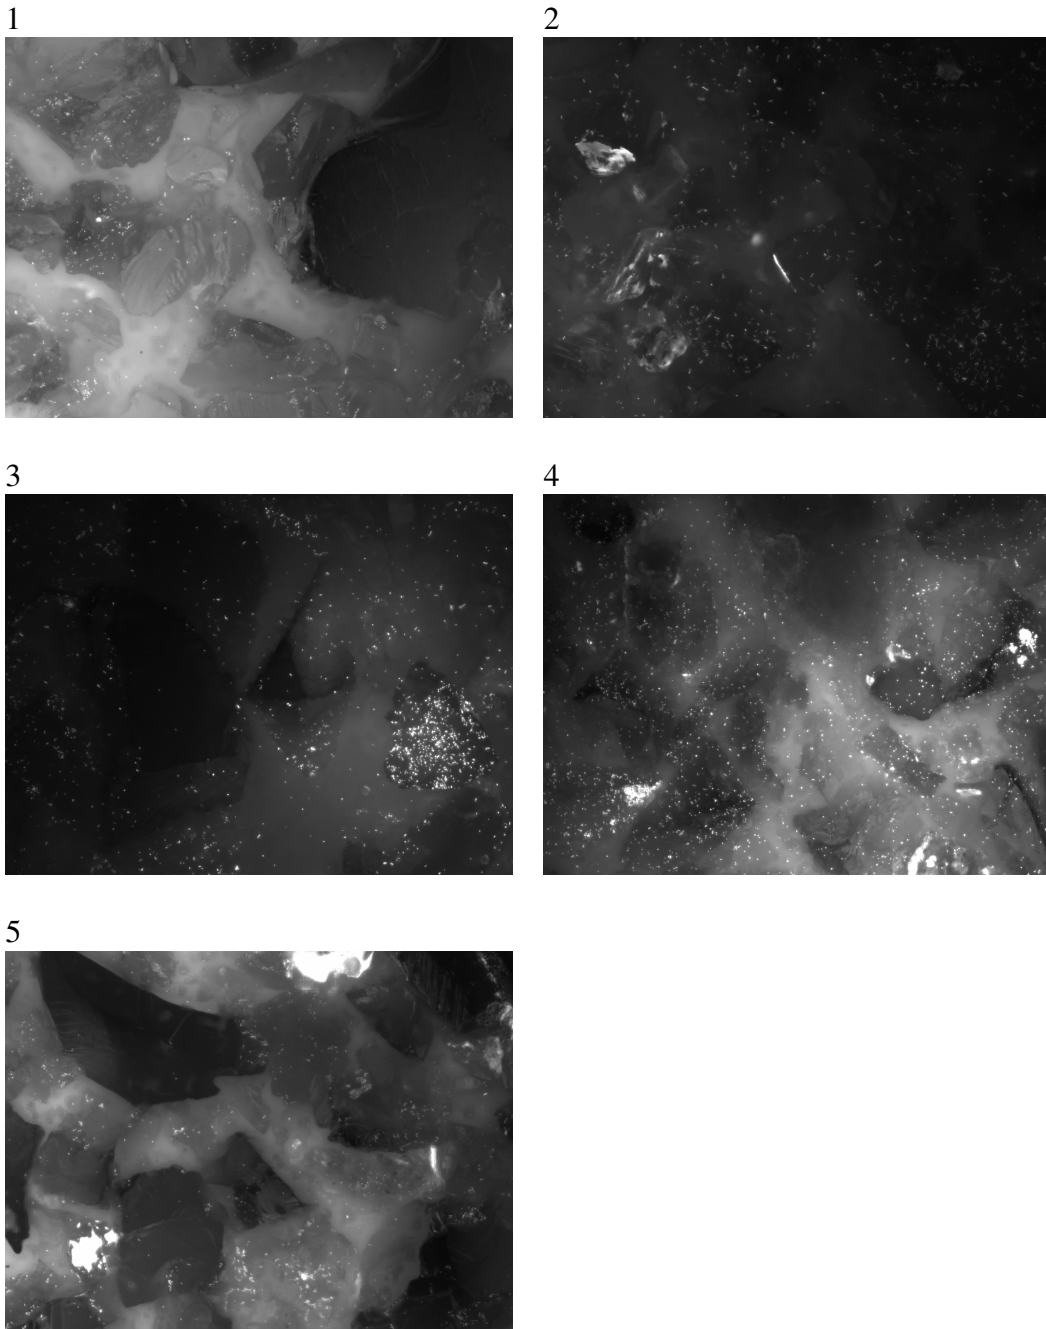

Figure 7: Test (part 1)

6

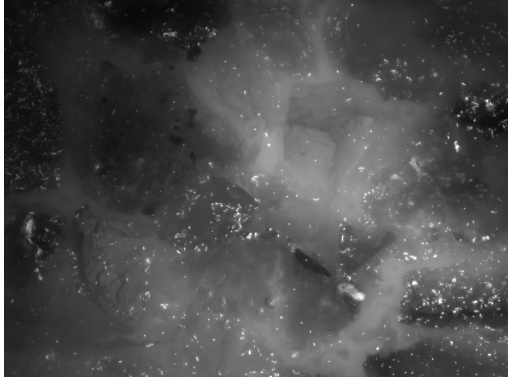

7

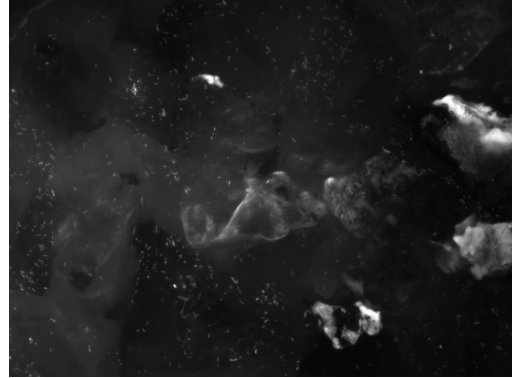

8

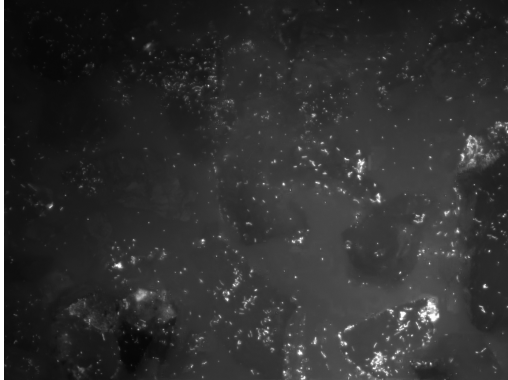

9

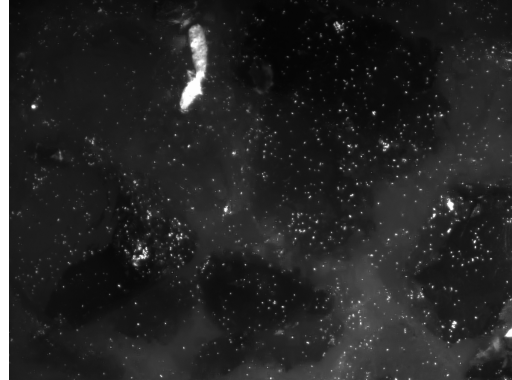

10

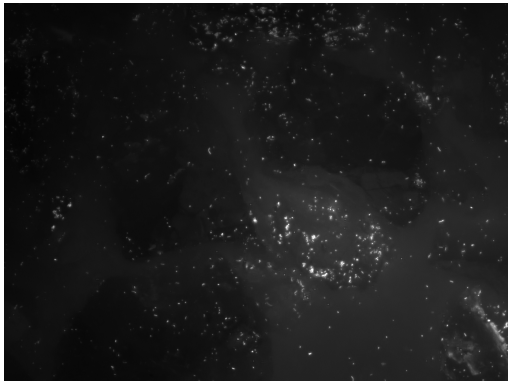

Figure 8: Test (part 2): Please write the name of what you think is the bacterial mixture as your answer. Some features in particular were determinant for your choice ? You can send the answers to [antoine.buetti@lnu.se](mailto:antoine.buetti@lnu.se). **THANK YOU!**
